# Supplementary material for: Unique selectivity reversal between Am3+ and Eu3+ ions by incorporation of alkyl branching in diglycolamide derivatives: DFT validation of experimental results
Source: Royal Society of Chemistry journal article supplement (doi:10.1039/d2nj03007a), 2022-01-01
Supplement: d2nj03007a1.pdf [file d2nj03007a1.pdf]

## Supporting Information

### **Unique selectivity reversal between Am<sup>3+</sup> and Eu<sup>3+</sup> ions by incorporation of alkyl branching in diglycolamide derivatives: DFT validation of experimental results**

Arunasis Bhattacharyya,<sup>a,\*</sup> Avinash S. Kanekar,<sup>a</sup> Richard J. M. Egberink<sup>b</sup>, Willem Verboom<sup>b,\*</sup> Jurriaan Huskens<sup>b</sup>,  
Prasanta K. Mohapatra,<sup>a,\*</sup>

<sup>a</sup> *Radiochemistry Division, Bhabha Atomic Research Centre, Mumbai, India*

<sup>b</sup> *Laboratory of Molecular Nanofabrication, University of Twente, The Netherlands*

(\* Corresponding Authors Email: arun12@barc.gov.in(AB), mpatra@barc.gov.in (PKM),  
w.verboom@utwente.nl (WV))

## Extraction studies

**Table S1:** Extraction data of nitric acid and water in the organic phase comprising of 0.01 M nBuDGA or sBuDGA in toluene; Aq. Phase 3M HNO<sub>3</sub>

| [HNO <sub>3</sub> ] | nBuDGA                                 |                                       | sBuDGA                                 |                                       |
|---------------------|----------------------------------------|---------------------------------------|----------------------------------------|---------------------------------------|
|                     | [HNO <sub>3</sub> ] <sub>org</sub> (M) | [H <sub>2</sub> O] <sub>org</sub> (M) | [HNO <sub>3</sub> ] <sub>org</sub> (M) | [H <sub>2</sub> O] <sub>org</sub> (M) |
| 0.01                | 0.02                                   | 0.039                                 | 7.6 x10 <sup>-3</sup>                  | 0.044                                 |
| 0.5                 | 0.016                                  | 0.044                                 | 6.7 x 10 <sup>-3</sup>                 | 0.056                                 |
| 1.0                 | 0.011                                  | 0.056                                 | 4.9 x 10 <sup>-3</sup>                 | 0.044                                 |
| 2.0                 | 0.011                                  | 0.067                                 | 0.015                                  | 0.044                                 |
| 3.0                 | 0.018                                  | 0.089                                 | 0.012                                  | 0.044                                 |
| 4.0                 | 0.022                                  | 0.100                                 | 0.015                                  | 0.044                                 |
| 6.0                 | 0.032                                  | 0.106                                 | 0.02                                   | 0.061                                 |

## FTIR studies

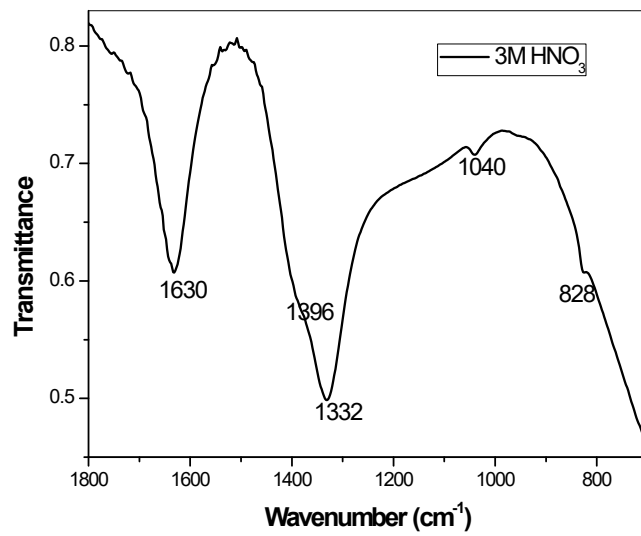

**Figure S1:** FTIR spectra of 3M HNO<sub>3</sub>

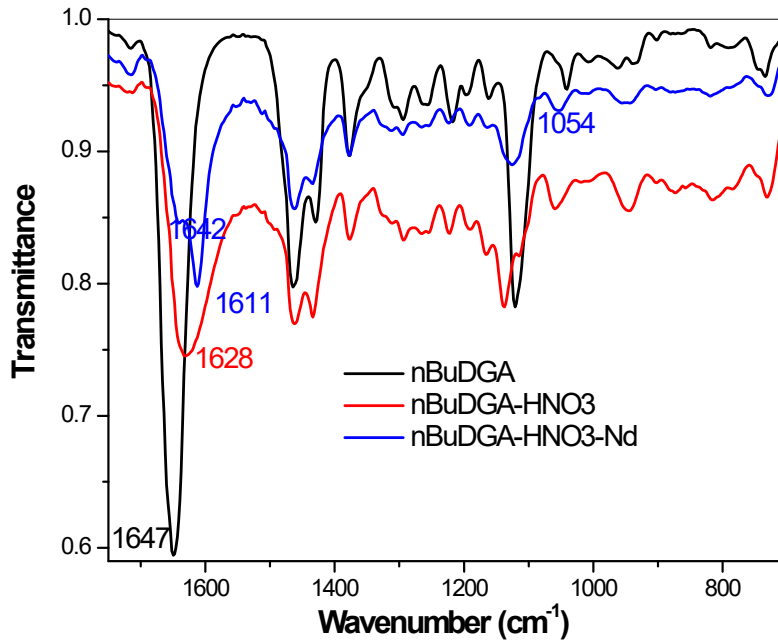

**Figure S2:** FTIR spectra of 0.01M nBuDGA in toluene before and after equilibration with 3M HNO<sub>3</sub> and 3M HNO<sub>3</sub>+0.02M Nd<sup>3+</sup>

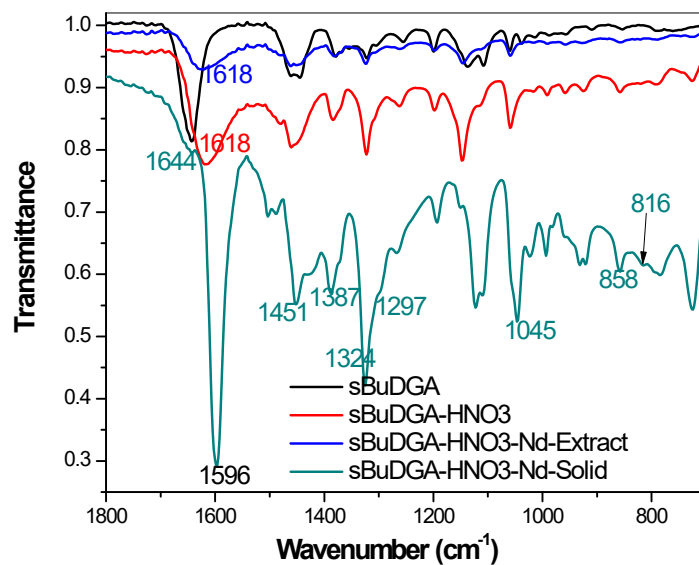

**Figure S3:** FTIR spectra of 0.01M sBuDGA in toluene before and after equilibration with 3M HNO<sub>3</sub> and 3M HNO<sub>3</sub>+0.02M Nd<sup>3+</sup> and solid precipitate of the Nd<sup>3+</sup>-sBuDGA complex

## Computational Studies

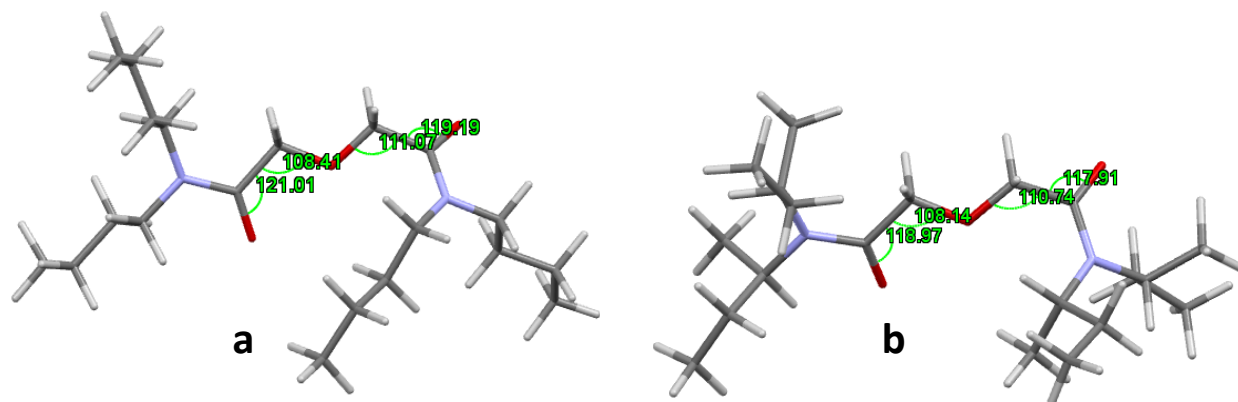

**Figure S4:** Energy optimized structures of (a) nBuDGA and (b) sBuDGA at the BP86/SV(P) level of theory showing the bond angles in the DGA part

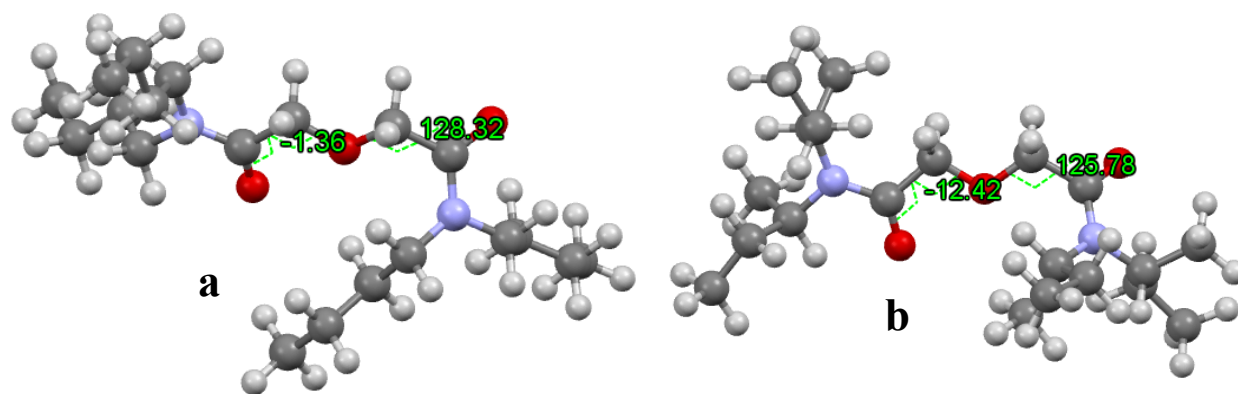

**Figure S5:** Energy optimized structures of (a) nBuDGA and (b) sBuDGA at the BP86/SV(P) level of theory showing the torsional angles in the coordination sites of the DGA part

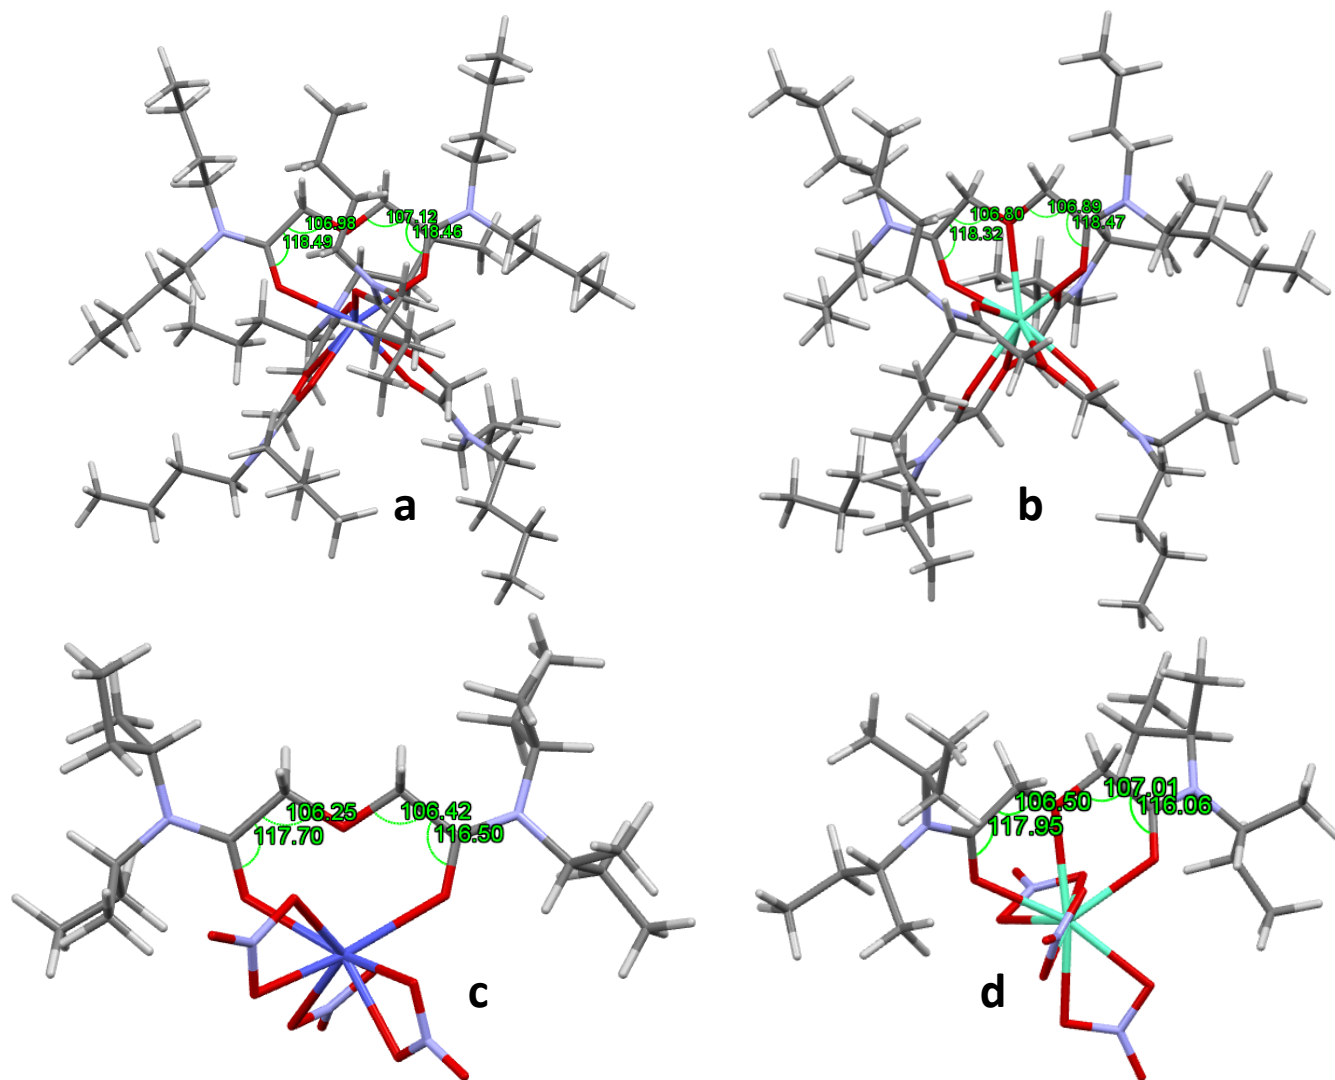

**Figure S6:** Energy optimized structures of  $\text{Am}^{3+}$  and  $\text{Eu}^{3+}$  complexes of nBuDGA and sBuDGA at the BP86/SV(P) level of theory showing the bond angles in the DGA part (a:  $\text{Am}(\text{nBuDGA})_3^{3+}$ ; b:  $\text{Eu}(\text{nBuDGA})_3^{3+}$ ; c:  $\text{Am}(\text{sBuDGA})(\text{NO}_3)_3$ ; d:  $\text{Eu}(\text{sBuDGA})(\text{NO}_3)_3$ )

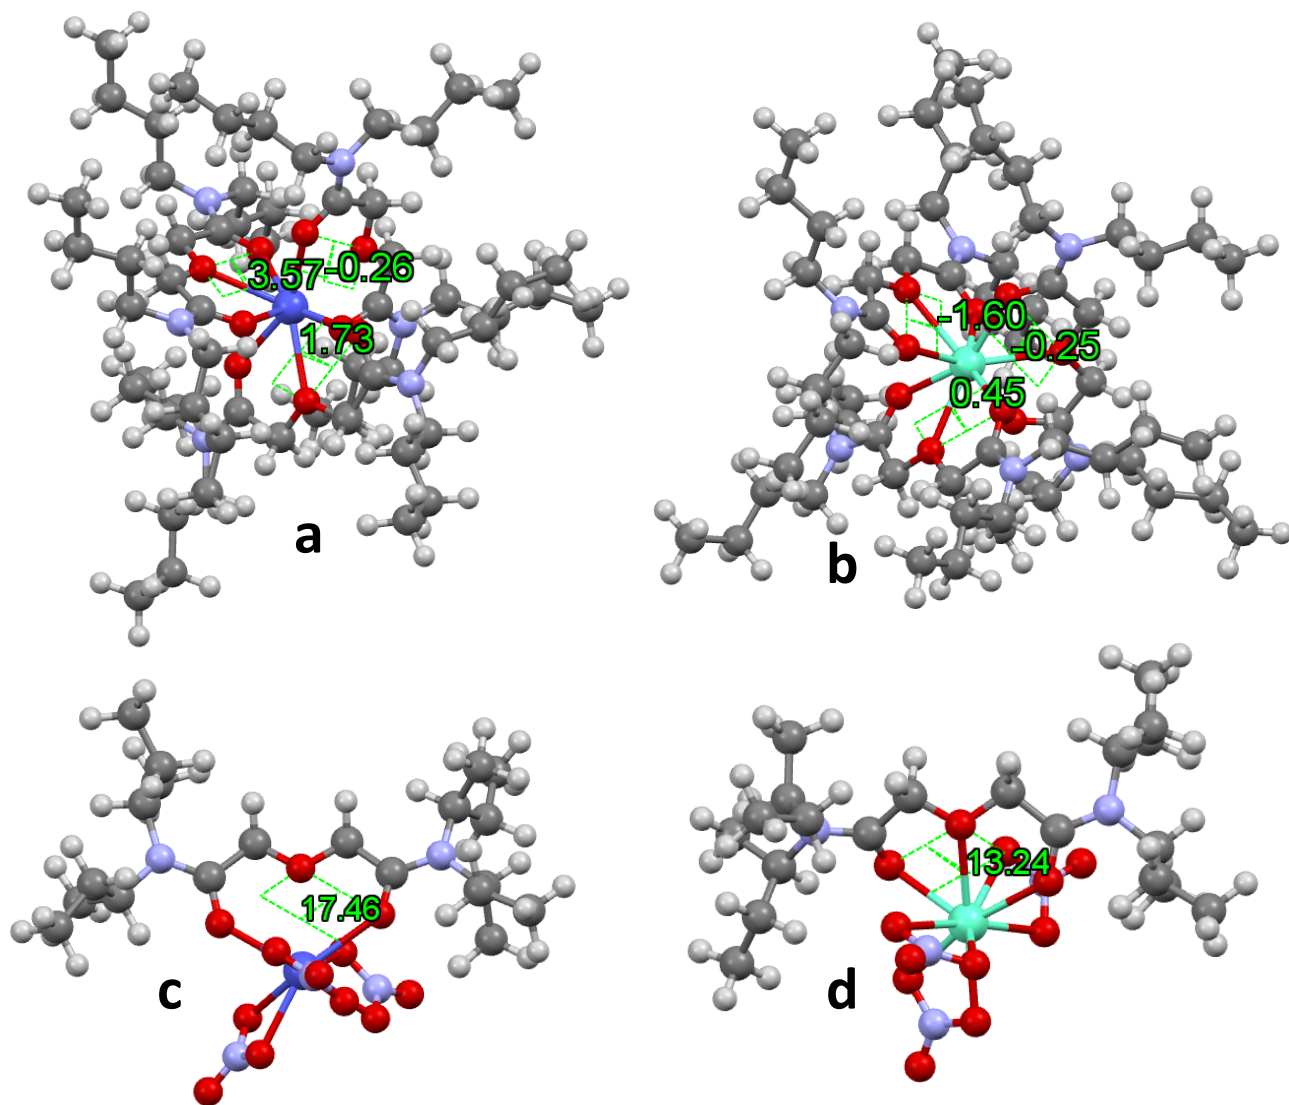

**Figure S7:** Energy optimized structures of  $\text{Am}^{3+}$  and  $\text{Eu}^{3+}$  complexes of nBuDGA and sBuDGA at the BP86/SV(P) level of theory showing the deviation from the coplanarity of the metal ion and the three coordinating 'O' atoms of the DGA units (a:  $\text{Am}(\text{nBuDGA})_3^{3+}$ ; b:  $\text{Eu}(\text{nBuDGA})_3^{3+}$ ; c:  $\text{Am}(\text{sBuDGA})(\text{NO}_3)_3$ ; d:  $\text{Eu}(\text{sBuDGA})(\text{NO}_3)_3$ )

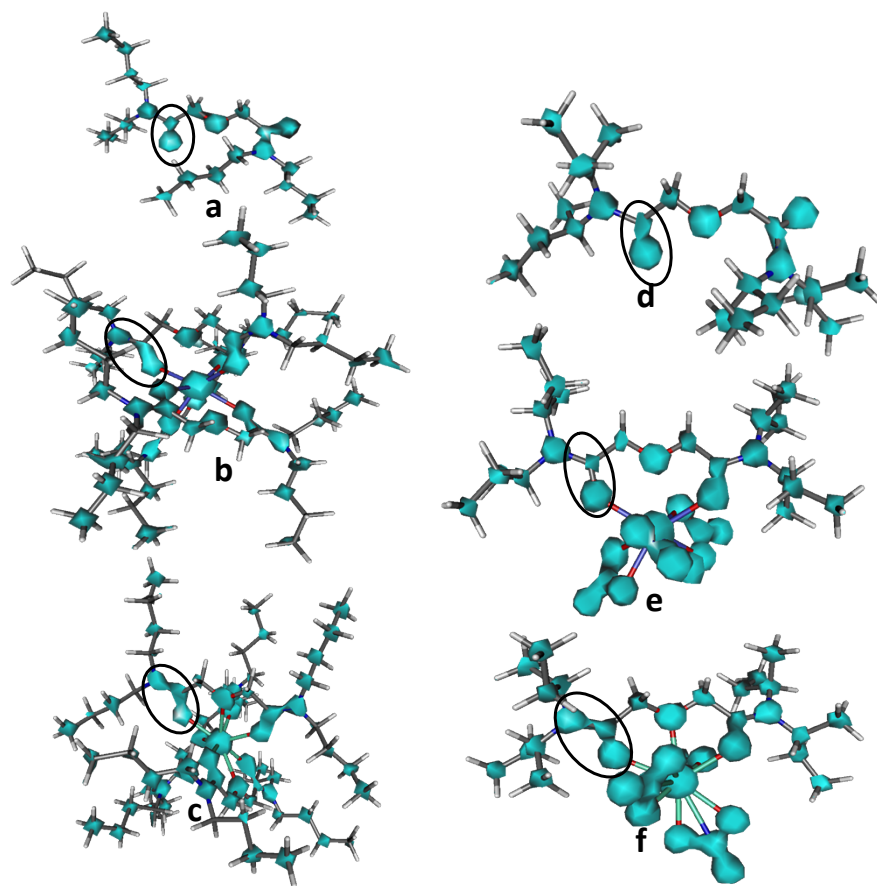

**Figure S8:** Electron density distribution in the free nBuDGA, sBuDGA and their complexes with  $\text{Am}^{3+}$  and  $\text{Eu}^{3+}$  (a: nBuDGA; b:  $\text{Am}(\text{nBuDGA})_3^{3+}$ ; c:  $\text{Eu}(\text{nBuDGA})_3^{3+}$ ; d: sBuDGA; e:  $\text{Am}(\text{sBuDGA})(\text{NO}_3)_3$ ; f:  $\text{Eu}(\text{sBuDGA})(\text{NO}_3)_3$ ) (encircled parts show the charge polarization in the coordination site of the ligand).



**Table S2:** Cartesian coordinates of the optimized structures of nBuDGA, sBuDGA and their Am<sup>3+</sup> and Eu<sup>3+</sup> complexes

**nBuDGA**

|   |            |             |            |
|---|------------|-------------|------------|
| C | -3.8346370 | -2.8084149  | -3.3900037 |
| C | -3.1563725 | -3.9170095  | -2.5624190 |
| H | -3.8986115 | -4.7179387  | -2.2944512 |
| H | -2.4028917 | -4.3751421  | -3.2462887 |
| O | -2.5456062 | -3.3842443  | -1.4022189 |
| C | -1.7869452 | -4.3256372  | -0.6948124 |
| H | -2.4163440 | -5.2007197  | -0.3797951 |
| H | -0.9668594 | -4.7412126  | -1.3401388 |
| C | -1.1778982 | -3.6304912  | 0.5436441  |
| N | -0.4078870 | -4.4220260  | 1.3746194  |
| N | -4.7259025 | -1.9707912  | -2.7600108 |
| O | -1.3712847 | -2.4353459  | 0.7582325  |
| O | -3.5777415 | -2.7130364  | -4.5940333 |
| C | 0.2159192  | -3.7849991  | 2.5401649  |
| H | 0.1440959  | -4.4834748  | 3.4053082  |
| H | -0.3887600 | -2.8856040  | 2.7784499  |
| C | -0.2010902 | -5.8595879  | 1.1949712  |
| H | -0.2526527 | -6.1125911  | 0.1146910  |
| H | 0.8440447  | -6.0934270  | 1.5018173  |
| C | 1.6806533  | -3.3769671  | 2.3054719  |
| H | 2.2851627  | -4.2760518  | 2.0344877  |
| H | 1.7202092  | -2.6928547  | 1.4272027  |
| C | 2.3094306  | -2.6887257  | 3.5277216  |
| H | 2.2110017  | -3.3534823  | 4.4190124  |
| H | 1.7247700  | -1.7697100  | 3.7683772  |
| C | 3.7852814  | -2.3209062  | 3.3263740  |
| H | 4.2019758  | -1.8070103  | 4.2206144  |
| H | 4.4066374  | -3.2262093  | 3.1393798  |
| H | 3.9178674  | -1.6402113  | 2.4552357  |
| C | -1.1776691 | -6.7485813  | 1.9892122  |
| H | -2.2218956 | -6.5204062  | 1.6714418  |
| H | -1.1196923 | -6.4807523  | 3.0700035  |
| C | -0.8960563 | -8.2496153  | 1.8160843  |
| H | 0.1581096  | -8.4625113  | 2.1137266  |
| H | -0.9640299 | -8.5146371  | 0.7342089  |
| C | -1.8454437 | -9.1447916  | 2.6232209  |
| H | -2.9064066 | -8.9835462  | 2.3261389  |
| H | -1.6140653 | -10.2220750 | 2.4712449  |
| H | -1.7694353 | -8.9349226  | 3.7141688  |
| C | -5.3158349 | -0.9070778  | -3.5857002 |
| H | -6.2621505 | -0.5906192  | -3.0936980 |
| H | -5.5727459 | -1.3498445  | -4.5730257 |
| C | -4.4000974 | 0.3088915   | -3.8104353 |

|   |            |            |            |
|---|------------|------------|------------|
| H | -3.4580789 | -0.0480634 | -4.2825310 |
| H | -4.1203625 | 0.7547019  | -2.8282125 |
| C | -5.0509742 | 1.3792401  | -4.7012641 |
| H | -5.3160358 | 0.9250687  | -5.6852154 |
| H | -6.0171222 | 1.7056803  | -4.2466373 |
| C | -4.1562537 | 2.6048417  | -4.9287790 |
| H | -3.1942711 | 2.3173447  | -5.4102247 |
| H | -4.6507108 | 3.3556322  | -5.5847092 |
| H | -3.9082146 | 3.1091880  | -3.9672086 |
| C | -5.1611350 | -2.0939554 | -1.3650845 |
| H | -6.2737224 | -1.9993165 | -1.3520268 |
| H | -4.9296374 | -3.1183532 | -1.0106800 |
| C | -4.5362355 | -1.0802767 | -0.3925685 |
| H | -3.4319630 | -1.2044453 | -0.4245305 |
| H | -4.7717122 | -0.0431924 | -0.7284637 |
| C | -5.0298390 | -1.2722565 | 1.0496066  |
| H | -4.8213836 | -2.3218338 | 1.3655550  |
| H | -6.1396938 | -1.1519494 | 1.0909669  |
| C | -4.3643445 | -0.3100289 | 2.0421447  |
| H | -4.7416626 | -0.4656609 | 3.0776878  |
| H | -3.2624849 | -0.4615617 | 2.0511427  |
| H | -4.5595730 | 0.7525140  | 1.7697921  |

#### sBuDGA

|   |            |            |            |
|---|------------|------------|------------|
| C | -3.6584196 | -2.3801160 | -3.1143610 |
| C | -2.9956084 | -3.6002142 | -2.4376155 |
| H | -3.7663284 | -4.3269697 | -2.0604588 |
| H | -2.4333855 | -4.1046513 | -3.2582232 |
| O | -2.1261195 | -3.1866364 | -1.3982668 |
| C | -1.2427084 | -4.1916732 | -0.9743439 |
| H | -1.7995258 | -5.0842110 | -0.5916217 |
| H | -0.6151890 | -4.5465036 | -1.8320815 |
| C | -0.3131497 | -3.5916643 | 0.1017023  |
| N | 0.5120888  | -4.4509311 | 0.8166296  |
| N | -4.3279950 | -1.4696011 | -2.3306327 |
| O | -0.2928432 | -2.3712595 | 0.2584862  |
| O | -3.5516028 | -2.2700157 | -4.3410491 |
| C | 1.4999414  | -3.7972957 | 1.7167625  |
| H | 1.2821929  | -2.7168196 | 1.5925256  |
| C | 0.5087817  | -5.9351946 | 0.7822726  |
| H | 1.3845599  | -6.2083754 | 1.4085650  |
| C | 1.2602151  | -4.1445023 | 3.2041798  |
| H | 0.1776376  | -3.9938949 | 3.4157889  |
| H | 1.4730950  | -5.2236886 | 3.3933687  |
| C | 2.0817826  | -3.2914300 | 4.1826179  |
| H | 1.9054533  | -2.2049027 | 4.0147855  |

|   |            |            |            |
|---|------------|------------|------------|
| H | 3.1749209  | -3.4748864 | 4.0887245  |
| C | -0.7183497 | -6.5562275 | 1.4987376  |
| H | -1.6457660 | -6.3534489 | 0.9166825  |
| H | -0.8448921 | -6.0312550 | 2.4707995  |
| C | -0.5972745 | -8.0666669 | 1.7469368  |
| H | 0.3372413  | -8.3147394 | 2.3009200  |
| H | -0.5927357 | -8.6506821 | 0.8007193  |
| C | -4.8245227 | -0.2156669 | -2.9636924 |
| H | -5.2710856 | 0.3665680  | -2.1289380 |
| C | -3.6566351 | 0.6373399  | -3.5180970 |
| H | -3.1888791 | 0.0941513  | -4.3659547 |
| H | -2.8839562 | 0.7072338  | -2.7191974 |
| C | -4.0656611 | 2.0514582  | -3.9511855 |
| H | -4.7453662 | 2.0434550  | -4.8319986 |
| H | -4.5829053 | 2.6023844  | -3.1313798 |
| C | -4.5520241 | -1.6426376 | -0.8740016 |
| H | -4.1458176 | -2.6385556 | -0.6153149 |
| C | -6.0647926 | -1.6767782 | -0.5407326 |
| H | -6.5251561 | -0.6778141 | -0.7225349 |
| H | -6.5524589 | -2.3784548 | -1.2553408 |
| C | -6.3790375 | -2.1224375 | 0.8949964  |
| H | -6.0110187 | -1.3961181 | 1.6522972  |
| H | -5.9159516 | -3.1094613 | 1.1245297  |
| H | -3.1699399 | 2.6464975  | -4.2366057 |
| H | -7.4765838 | -2.2258541 | 1.0433254  |
| H | 1.8003387  | -3.5186239 | 5.2344209  |
| H | -1.4516908 | -8.4341029 | 2.3566632  |
| C | 2.9412279  | -4.0487200 | 1.2417805  |
| H | 3.2487907  | -5.1143656 | 1.3490400  |
| H | 3.0563893  | -3.7594036 | 0.1745738  |
| H | 3.6589834  | -3.4382013 | 1.8310964  |
| C | 0.7934205  | -6.5513341 | -0.6035206 |
| H | -0.1043924 | -6.5896494 | -1.2560636 |
| H | 1.5873141  | -5.9809227 | -1.1314723 |
| H | 1.1535861  | -7.5966111 | -0.4879357 |
| C | -3.7445001 | -0.6256525 | -0.0488541 |
| H | -3.8885674 | -0.8042286 | 1.0391748  |
| H | -2.6616896 | -0.7449473 | -0.2640943 |
| H | -4.0506043 | 0.4238337  | -0.2594775 |
| C | -5.9450870 | -0.4826598 | -3.9859553 |
| H | -6.3911367 | 0.4749642  | -4.3335923 |
| H | -5.5473299 | -1.0360403 | -4.8604044 |
| H | -6.7597586 | -1.0844616 | -3.5266984 |

**Am(nBuDGA)<sub>3</sub><sup>3+</sup>**

|   |            |            |           |
|---|------------|------------|-----------|
| C | -5.0909299 | -4.2683953 | 4.3971062 |
|---|------------|------------|-----------|

|    |            |            |            |
|----|------------|------------|------------|
| C  | -3.8566979 | -3.3864562 | 4.1365377  |
| C  | -2.9335498 | -3.9821010 | 3.0602556  |
| N  | -1.6997611 | -3.2030094 | 2.8189133  |
| C  | -1.5606439 | -2.3218253 | 1.8165874  |
| C  | -2.7349164 | -2.1104477 | 0.8523640  |
| O  | -2.3674267 | -1.0556832 | -0.0233137 |
| C  | -3.3211089 | -0.7909208 | -1.0388614 |
| C  | -2.7703968 | 0.3622240  | -1.8856643 |
| N  | -3.5562268 | 0.8884920  | -2.8377193 |
| C  | -4.9512762 | 0.4521322  | -3.0715482 |
| C  | -6.0045059 | 1.2864926  | -2.3222626 |
| C  | -7.4428336 | 0.8544121  | -2.6633062 |
| C  | -0.5736474 | -3.4375551 | 3.7473036  |
| C  | 0.3095924  | -4.6293331 | 3.3422420  |
| C  | 1.4336190  | -4.8961732 | 4.3577815  |
| O  | -0.4972505 | -1.6675814 | 1.6237061  |
| Am | 0.0428993  | 0.0408993  | -0.0162005 |
| O  | 0.0994373  | -1.8366459 | -1.6041729 |
| C  | 1.0242498  | -2.6596078 | -1.8544697 |
| N  | 0.9213632  | -3.6220998 | -2.7850739 |
| C  | 1.9800736  | -4.6234641 | -3.0447346 |
| C  | 1.7954142  | -5.9444949 | -2.2781837 |
| C  | 2.8621071  | -6.9908317 | -2.6494317 |
| O  | -1.2959392 | 1.3525805  | 1.5555883  |
| C  | -1.3355785 | 2.5983274  | 1.7573726  |
| N  | -2.0689753 | 3.1578380  | 2.7324232  |
| C  | -2.1235882 | 4.6147024  | 2.9843467  |
| C  | -1.1701450 | 5.1020611  | 4.0884043  |
| C  | -1.3351603 | 6.6051863  | 4.3774712  |
| O  | 0.2619630  | 2.6706492  | -0.0038151 |
| C  | 1.0127558  | 3.3798160  | -0.9798001 |
| C  | 1.7592599  | 2.3389413  | -1.8219557 |
| N  | 2.6350864  | 2.7644618  | -2.7436207 |
| C  | 2.9531415  | 4.1925380  | -2.9681451 |
| C  | 4.1900739  | 4.6904060  | -2.2006527 |
| C  | 4.5390619  | 6.1505731  | -2.5420426 |
| O  | 1.5164572  | 1.1149737  | -1.6136437 |
| O  | -1.5954396 | 0.7695519  | -1.6577084 |
| O  | 2.1492984  | -1.5287755 | -0.0881953 |
| C  | 3.2728508  | -1.3444395 | 0.7629675  |
| C  | 2.9155361  | -0.2205839 | 1.7435794  |
| N  | 3.7808700  | 0.0821074  | 2.7220955  |
| C  | 5.0628650  | -0.6284506 | 2.9269778  |
| C  | 5.0041943  | -1.7455105 | 3.9826258  |
| C  | 6.3785113  | -2.4015194 | 4.2102420  |
| C  | -0.5173013 | 3.5131099  | 0.8367270  |
| C  | 2.3322170  | -2.5493770 | -1.0606746 |
| O  | 1.8185628  | 0.3881487  | 1.5821047  |

|   |            |            |            |
|---|------------|------------|------------|
| C | -3.0518787 | 1.9803646  | -3.6975336 |
| C | -2.5583469 | 1.5004299  | -5.0720438 |
| C | -2.1261664 | 2.6691626  | -5.9754135 |
| C | 3.4708641  | 1.1776445  | 3.6665152  |
| C | 4.1176711  | 2.5167911  | 3.2760748  |
| C | 3.8600301  | 3.6178630  | 4.3194730  |
| C | -0.3098298 | -3.7389425 | -3.5950611 |
| C | -0.1983663 | -3.0786109 | -4.9788816 |
| C | -1.4577498 | -3.3046200 | -5.8344347 |
| C | -2.8830249 | 2.2989869  | 3.6187236  |
| C | -4.3349617 | 2.1377411  | 3.1392972  |
| C | -5.1858034 | 1.3071495  | 4.1155439  |
| C | 3.3569828  | 1.7854811  | -3.5845418 |
| C | 2.7011476  | 1.5505361  | -4.9546637 |
| C | 3.5260256  | 0.5960244  | -5.8362956 |
| H | -4.1775984 | -2.3626072 | 3.8292232  |
| H | -0.3174874 | -5.5452196 | 3.2388904  |
| H | -5.8363293 | 1.2041191  | -1.2217197 |
| H | -3.3661700 | 0.9260355  | -5.5823021 |
| H | 5.2171865  | 2.3817442  | 3.1514166  |
| H | 4.2608293  | -2.5173390 | 3.6714900  |
| H | 1.8231856  | -5.7484815 | -1.1798637 |
| H | 0.6871820  | -3.4861496 | -5.5198299 |
| H | -4.8012781 | 3.1419225  | 3.0086123  |
| H | -0.1152645 | 4.8831634  | 3.7961677  |
| H | 4.0173831  | 4.5887404  | -1.1025425 |
| H | 2.5791334  | 2.5240897  | -5.4837932 |
| H | -2.9293792 | -3.0462686 | 0.2718591  |
| H | -3.6684500 | -1.8519532 | 1.4065318  |
| H | -2.6124145 | -5.0030635 | 3.3611811  |
| H | -3.4806518 | -4.1128278 | 2.1033356  |
| H | -3.2851279 | -3.2606126 | 5.0848603  |
| C | -6.0048023 | -3.7142191 | 5.4970550  |
| H | -4.7534057 | -5.2936671 | 4.6760935  |
| H | -5.6689744 | -4.3845990 | 3.4500838  |
| H | -1.0114220 | -3.6059510 | 4.7547081  |
| H | 0.0233969  | -2.5043229 | 3.7920892  |
| H | 0.7453066  | -4.4303777 | 2.3350132  |
| H | 0.9844779  | -5.0912502 | 5.3590548  |
| H | 2.0485718  | -3.9722465 | 4.4765500  |
| C | 2.3351408  | -6.0738106 | 3.9657116  |
| H | -4.3047759 | -0.5211479 | -0.5875685 |
| H | -3.4740012 | -1.6965678 | -1.6764652 |
| H | -5.0494668 | -0.6249936 | -2.8203727 |
| H | -5.1254305 | 0.5181572  | -4.1666056 |
| H | -5.8701167 | 2.3633403  | -2.5758589 |
| H | -7.5986263 | 0.9455589  | -3.7633197 |
| C | -8.5072976 | 1.6750979  | -1.9243458 |

|   |            |            |            |
|---|------------|------------|------------|
| H | -7.5708003 | -0.2281193 | -2.4257030 |
| H | -2.2354628 | 2.4871713  | -3.1459653 |
| H | -3.8823639 | 2.7093269  | -3.8197739 |
| H | -1.7089088 | 0.7931149  | -4.9271926 |
| C | -1.6509744 | 2.2160161  | -7.3616032 |
| H | -1.3158339 | 3.2458913  | -5.4689401 |
| H | -2.9785242 | 3.3787035  | -6.0909631 |
| H | 4.1724992  | -1.0626390 | 0.1621413  |
| H | 3.5079812  | -2.2904219 | 1.3059539  |
| H | 5.8069650  | 0.1392517  | 3.2295653  |
| H | 5.4246760  | -1.0254135 | 1.9555290  |
| H | 4.6299651  | -1.3255106 | 4.9444081  |
| C | 6.3517730  | -3.4973472 | 5.2828683  |
| H | 7.1133203  | -1.6151577 | 4.5003121  |
| H | 6.7504951  | -2.8258454 | 3.2478117  |
| H | 3.8286684  | 0.8539489  | 4.6671872  |
| H | 2.3676715  | 1.2731503  | 3.7177017  |
| H | 3.7250104  | 2.8329630  | 2.2813386  |
| H | 4.2486885  | 3.2825677  | 5.3087581  |
| H | 2.7596298  | 3.7482896  | 4.4542592  |
| C | 4.5020862  | 4.9607499  | 3.9492438  |
| H | 2.5796646  | -3.5167191 | -0.5627711 |
| H | 3.1799686  | -2.2886028 | -1.7400570 |
| H | 2.9737734  | -4.1776185 | -2.8282826 |
| H | 1.9736505  | -4.8172403 | -4.1385161 |
| H | 0.7823509  | -6.3566296 | -2.4934227 |
| H | 2.8304758  | -7.1680770 | -3.7495239 |
| C | 2.6790585  | -8.3222894 | -1.9103709 |
| H | 3.8763777  | -6.5780246 | -2.4361125 |
| H | -1.1361141 | -3.2840998 | -3.0126996 |
| H | -0.5284011 | -4.8234090 | -3.7017220 |
| H | -0.0155415 | -1.9868491 | -4.8478259 |
| C | -1.3661041 | -2.6600583 | -7.2230352 |
| H | -2.3483873 | -2.9071103 | -5.2916021 |
| H | -1.6337667 | -4.3998306 | -5.9453949 |
| H | -1.1985217 | 4.1479403  | 0.2185987  |
| H | 0.1423841  | 4.1920318  | 1.4260792  |
| H | -3.1740124 | 4.8499417  | 3.2614993  |
| H | -1.9384975 | 5.1615322  | 2.0358842  |
| H | -1.3584613 | 4.5222047  | 5.0213219  |
| C | -0.4026724 | 7.1118199  | 5.4845245  |
| H | -2.3941642 | 6.8060937  | 4.6617983  |
| H | -1.1566360 | 7.1843409  | 3.4408722  |
| H | -2.8582730 | 2.7590040  | 4.6296156  |
| H | -2.3800226 | 1.3130921  | 3.6850501  |
| H | -4.3313063 | 1.6578074  | 2.1327487  |
| H | -5.1801670 | 1.7981297  | 5.1160364  |
| H | -4.7064084 | 0.3097700  | 4.2646902  |

|   |            |            |            |
|---|------------|------------|------------|
| C | -6.6347248 | 1.1217264  | 3.6472601  |
| H | 1.7264774  | 4.0821882  | -0.4878511 |
| H | 0.3303822  | 3.9841495  | -1.6269670 |
| H | 2.0639099  | 4.8122194  | -2.7271119 |
| H | 3.1117988  | 4.3134767  | -4.0612879 |
| H | 5.0600345  | 4.0357440  | -2.4389935 |
| H | 4.7078111  | 6.2362477  | -3.6406245 |
| C | 5.7740396  | 6.6642446  | -1.7912712 |
| H | 3.6631908  | 6.8035221  | -2.3159512 |
| H | 3.4170206  | 0.8362051  | -3.0155106 |
| H | 4.3922465  | 2.1693528  | -3.7120632 |
| H | 1.6758943  | 1.1403613  | -4.8020451 |
| C | 2.8928187  | 0.3448046  | -7.2103170 |
| H | 3.6620873  | -0.3742646 | -5.3015106 |
| H | 4.5503490  | 1.0150524  | -5.9714229 |
| H | -6.8822329 | -4.3768824 | 5.6537165  |
| H | -5.4695355 | -3.6349990 | 6.4693627  |
| H | -6.3914617 | -2.7031064 | 5.2379313  |
| H | 3.1342795  | -6.2343971 | 4.7206847  |
| H | 1.7569950  | -7.0213926 | 3.8897362  |
| H | 2.8300881  | -5.9027657 | 2.9823048  |
| H | -9.5290120 | 1.3388303  | -2.2010216 |
| H | -8.4092723 | 1.5738428  | -0.8199712 |
| H | -8.4335111 | 2.7567609  | -2.1744701 |
| H | -1.3455268 | 3.0847783  | -7.9832402 |
| H | -0.7778432 | 1.5286758  | -7.2913298 |
| H | -2.4571746 | 1.6825660  | -7.9121861 |
| H | -7.2166575 | 0.5170712  | 4.3754669  |
| H | -7.1551621 | 2.0991339  | 3.5395853  |
| H | -6.6851045 | 0.6032948  | 2.6626474  |
| H | -0.5565639 | 8.1968241  | 5.6656409  |
| H | -0.5879559 | 6.5838133  | 6.4462335  |
| H | 0.6679772  | 6.9660370  | 5.2172834  |
| H | 5.9964426  | 7.7163354  | -2.0692551 |
| H | 5.6260336  | 6.6338043  | -0.6883911 |
| H | 6.6762485  | 6.0586607  | -2.0302655 |
| H | 3.5175950  | -0.3440849 | -7.8181743 |
| H | 1.8807606  | -0.1103441 | -7.1180866 |
| H | 2.7863937  | 1.2903193  | -7.7866780 |
| H | -2.2889254 | -2.8469544 | -7.8127302 |
| H | -1.2272835 | -1.5575989 | -7.1539718 |
| H | -0.5123019 | -3.0715947 | -7.8056508 |
| H | 3.4640282  | -9.0504836 | -2.2058298 |
| H | 2.7428236  | -8.1907355 | -0.8069572 |
| H | 1.6930893  | -8.7838833 | -2.1414338 |
| H | 7.3599262  | -3.9435653 | 5.4178919  |
| H | 6.0313966  | -3.0936297 | 6.2688672  |
| H | 5.6549248  | -4.3212640 | 5.0098307  |

|   |           |           |           |
|---|-----------|-----------|-----------|
| H | 4.2983876 | 5.7293321 | 4.7252909 |
| H | 5.6069746 | 4.8705356 | 3.8553463 |
| H | 4.1129365 | 5.3485581 | 2.9805454 |

**Eu(nBuDGA)<sub>3</sub><sup>3+</sup>**

|    |            |            |            |
|----|------------|------------|------------|
| C  | -5.0572116 | -4.2771682 | 4.4080142  |
| C  | -3.8213888 | -3.4163744 | 4.0904854  |
| C  | -2.9581602 | -4.0265001 | 2.9732851  |
| N  | -1.7140075 | -3.2779867 | 2.6928455  |
| C  | -1.5929674 | -2.3770905 | 1.7045696  |
| C  | -2.8002070 | -2.1069312 | 0.7966976  |
| O  | -2.4315090 | -1.0478796 | -0.0711941 |
| C  | -3.4242568 | -0.7175764 | -1.0267678 |
| C  | -2.8678622 | 0.4398961  | -1.8657829 |
| N  | -3.6585853 | 0.9914127  | -2.8048555 |
| C  | -5.0580290 | 0.5764131  | -3.0389764 |
| C  | -6.0981199 | 1.4351914  | -2.2960959 |
| C  | -7.5422503 | 1.0144719  | -2.6270154 |
| C  | -0.5527054 | -3.5660797 | 3.5601939  |
| C  | 0.2716266  | -4.7761888 | 3.0908428  |
| C  | 1.4420196  | -5.0919447 | 4.0369403  |
| O  | -0.5231355 | -1.7484413 | 1.4801035  |
| Eu | -0.0056322 | 0.0306269  | -0.0727091 |
| O  | 0.1396579  | -1.8162803 | -1.6482463 |
| C  | 1.0552105  | -2.6594573 | -1.8466085 |
| N  | 0.9578654  | -3.6489756 | -2.7527056 |
| C  | 2.0073210  | -4.6697732 | -2.9612381 |
| C  | 1.7891328  | -5.9630619 | -2.1548419 |
| C  | 2.8518909  | -7.0318956 | -2.4685588 |
| O  | -1.2606793 | 1.3259386  | 1.5480363  |
| C  | -1.3188518 | 2.5692734  | 1.7439311  |
| N  | -2.0219336 | 3.1184389  | 2.7478838  |
| C  | -2.1048203 | 4.5745836  | 2.9926451  |
| C  | -1.1170526 | 5.0940724  | 4.0509969  |
| C  | -1.3046592 | 6.5945899  | 4.3390352  |
| O  | 0.2054091  | 2.6572153  | -0.0715949 |
| C  | 0.9698707  | 3.3628599  | -1.0344009 |
| C  | 1.7382903  | 2.3138148  | -1.8478541 |
| N  | 2.6424993  | 2.7286378  | -2.7481210 |
| C  | 2.9764601  | 4.1523314  | -2.9732993 |
| C  | 4.1904694  | 4.6435925  | -2.1659389 |
| C  | 4.5593120  | 6.1024155  | -2.4909223 |
| O  | 1.4843379  | 1.0939956  | -1.6424149 |
| O  | -1.6890998 | 0.8270442  | -1.6479054 |
| O  | 2.1454743  | -1.5033703 | -0.0827554 |
| C  | 3.2521732  | -1.2947319 | 0.7798606  |



|   |            |            |            |
|---|------------|------------|------------|
| C | 2.8811926  | -0.1281367 | 1.7064660  |
| N | 3.7336374  | 0.2058205  | 2.6931078  |
| C | 4.9982962  | -0.5122512 | 2.9569261  |
| C | 4.8959596  | -1.5993005 | 4.0419531  |
| C | 6.2576247  | -2.2563888 | 4.3330937  |
| C | -0.5588332 | 3.4940803  | 0.7823663  |
| C | 2.3432604  | -2.5468522 | -1.0216783 |
| O | 1.7975776  | 0.4783709  | 1.5006815  |
| C | -3.1344615 | 2.0763194  | -3.6592151 |
| C | -2.6062833 | 1.5823940  | -5.0169940 |
| C | -2.1386061 | 2.7394866  | -5.9169434 |
| C | 3.4106856  | 1.3356933  | 3.5891775  |
| C | 4.0949638  | 2.6509356  | 3.1778172  |
| C | 3.8117287  | 3.7919376  | 4.1705723  |
| C | -0.2510156 | -3.7578859 | -3.5947340 |
| C | -0.0871957 | -3.1172788 | -4.9838010 |
| C | -1.3297269 | -3.3177207 | -5.8692303 |
| C | -2.7653269 | 2.2404996  | 3.6761053  |
| C | -4.2177533 | 1.9879556  | 3.2407373  |
| C | -4.9947785 | 1.1396026  | 4.2619779  |
| C | 3.3716336  | 1.7352059  | -3.5646011 |
| C | 2.7287467  | 1.4810973  | -4.9375332 |
| C | 3.5424861  | 0.4901809  | -5.7881377 |
| H | -4.1388546 | -2.3873666 | 3.7972803  |
| H | -0.3875588 | -5.6717196 | 3.0105613  |
| H | -5.9252612 | 1.3646330  | -1.1957259 |
| H | -3.4047005 | 1.0094842  | -5.5434798 |
| H | 5.1962643  | 2.4956946  | 3.1033345  |
| H | 4.1580444  | -2.3751139 | 3.7270385  |
| H | 1.7967578  | -5.7301475 | -1.0632858 |
| H | 0.8007350  | -3.5556004 | -5.4959247 |
| H | -4.7408205 | 2.9617760  | 3.0952152  |
| H | -0.0710194 | 4.8984815  | 3.7134003  |
| H | 3.9803152  | 4.5405834  | -1.0743850 |
| H | 2.6317092  | 2.4449345  | -5.4891060 |
| H | -3.0541342 | -3.0238213 | 0.2085160  |
| H | -3.6982067 | -1.8295608 | 1.3988296  |
| H | -2.6541269 | -5.0589836 | 3.2513829  |
| H | -3.5453615 | -4.1313699 | 2.0370041  |
| H | -3.2044076 | -3.2996219 | 5.0111516  |
| C | -5.9213132 | -3.6956939 | 5.5335810  |
| H | -4.7235383 | -5.3034868 | 4.6877438  |
| H | -5.6722579 | -4.3972484 | 3.4851154  |
| H | -0.9455268 | -3.7399050 | 4.5851059  |
| H | 0.0756187  | -2.6529493 | 3.5906831  |
| H | 0.6560663  | -4.5749470 | 2.0634149  |
| H | 1.0468249  | -5.2649352 | 5.0647074  |
| H | 2.1041247  | -4.1961828 | 4.1147316  |

|   |            |            |            |
|---|------------|------------|------------|
| C | 2.2631658  | -6.3101982 | 3.5962297  |
| H | -4.3741614 | -0.4209450 | -0.5208335 |
| H | -3.6470102 | -1.5974974 | -1.6792133 |
| H | -5.1761973 | -0.4955132 | -2.7754663 |
| H | -5.2314015 | 0.6364251  | -4.1347978 |
| H | -5.9512944 | 2.5064283  | -2.5658206 |
| H | -7.6965115 | 1.0783788  | -3.7291213 |
| C | -8.5944281 | 1.8707632  | -1.9109177 |
| H | -7.6855668 | -0.0592072 | -2.3602278 |
| H | -2.3294743 | 2.5848380  | -3.0922378 |
| H | -3.9610258 | 2.8040532  | -3.8084994 |
| H | -1.7666537 | 0.8708787  | -4.8410674 |
| C | -1.6165573 | 2.2670092  | -7.2798214 |
| H | -1.3439467 | 3.3184008  | -5.3885939 |
| H | -2.9829877 | 3.4509932  | -6.0703607 |
| H | 4.1666335  | -1.0425841 | 0.1875758  |
| H | 3.4719462  | -2.2180742 | 1.3669356  |
| H | 5.7423194  | 0.2544388  | 3.2623557  |
| H | 5.3850242  | -0.9405798 | 2.0087359  |
| H | 4.4919042  | -1.1496204 | 4.9778013  |
| C | 6.1842933  | -3.3352971 | 5.4207129  |
| H | 6.9836319  | -1.4679500 | 4.6391176  |
| H | 6.6651639  | -2.6972322 | 3.3927918  |
| H | 3.7274026  | 1.0419525  | 4.6130087  |
| H | 2.3086065  | 1.4523877  | 3.5969401  |
| H | 3.7472284  | 2.9361737  | 2.1574201  |
| H | 4.1394268  | 3.4807593  | 5.1895206  |
| H | 2.7094208  | 3.9532924  | 4.2418610  |
| C | 4.5076401  | 5.1053459  | 3.7917992  |
| H | 2.5657465  | -3.5077238 | -0.4991830 |
| H | 3.2107351  | -2.3144548 | -1.6873714 |
| H | 3.0025758  | -4.2310010 | -2.7380428 |
| H | 2.0191623  | -4.8994781 | -4.0479970 |
| H | 0.7755614  | -6.3694216 | -2.3781669 |
| H | 2.8320659  | -7.2553569 | -3.5603655 |
| C | 2.6485867  | -8.3286314 | -1.6747915 |
| H | 3.8666269  | -6.6180395 | -2.2598169 |
| H | -1.0843446 | -3.2787914 | -3.0424722 |
| H | -0.4837342 | -4.8401769 | -3.6940603 |
| H | 0.1221309  | -2.0296221 | -4.8592819 |
| C | -1.1767775 | -2.7020899 | -7.2657198 |
| H | -2.2201567 | -2.8796419 | -5.3586437 |
| H | -1.5397774 | -4.4083100 | -5.9659032 |
| H | -1.2769388 | 4.1094945  | 0.1857177  |
| H | 0.1058401  | 4.1932887  | 1.3424456  |
| H | -3.1484257 | 4.7845433  | 3.3135162  |
| H | -1.9750565 | 5.1183287  | 2.0334115  |
| H | -1.2494287 | 4.5159274  | 4.9943973  |

|   |            |            |            |
|---|------------|------------|------------|
| C | -0.3341223 | 7.1296367  | 5.3991196  |
| H | -2.3538581 | 6.7725007  | 4.6710503  |
| H | -1.1833904 | 7.1716217  | 3.3922239  |
| H | -2.7392016 | 2.7255906  | 4.6750476  |
| H | -2.2096168 | 1.2839499  | 3.7515235  |
| H | -4.2116703 | 1.4792436  | 2.2484902  |
| H | -4.9938505 | 1.6597868  | 5.2476077  |
| H | -4.4535104 | 0.1770573  | 4.4271089  |
| C | -6.4408745 | 0.8547541  | 3.8375584  |
| H | 1.6707912  | 4.0729212  | -0.5346295 |
| H | 0.3031388  | 3.9589730  | -1.7058142 |
| H | 2.0844560  | 4.7798206  | -2.7648952 |
| H | 3.1719431  | 4.2656838  | -4.0613428 |
| H | 5.0637597  | 3.9836987  | -2.3760928 |
| H | 4.7718473  | 6.1898592  | -3.5816786 |
| C | 5.7659143  | 6.6074321  | -1.6899170 |
| H | 3.6784199  | 6.7591417  | -2.2978707 |
| H | 3.4188250  | 0.7947185  | -2.9795323 |
| H | 4.4099708  | 2.1124382  | -3.6862183 |
| H | 1.6941606  | 1.0939302  | -4.7877007 |
| C | 2.9220174  | 0.2282896  | -7.1660604 |
| H | 3.6459789  | -0.4723606 | -5.2324479 |
| H | 4.5789600  | 0.8804900  | -5.9165261 |
| H | -6.7985141 | -4.3465621 | 5.7353347  |
| H | -5.3478863 | -3.6063616 | 6.4829788  |
| H | -6.3078688 | -2.6850175 | 5.2725337  |
| H | 3.1028987  | -6.5024218 | 4.2978249  |
| H | 1.6393787  | -7.2309952 | 3.5676136  |
| H | 2.6985376  | -6.1680590 | 2.5805410  |
| H | -9.6205197 | 1.5366285  | -2.1743964 |
| H | -8.4943375 | 1.8037080  | -0.8042950 |
| H | -8.5098761 | 2.9428869  | -2.1960296 |
| H | -1.2900938 | 3.1272793  | -7.9026774 |
| H | -0.7464371 | 1.5809703  | -7.1700258 |
| H | -2.4035239 | 1.7254249  | -7.8499192 |
| H | -6.9671481 | 0.2380802  | 4.5975516  |
| H | -7.0217740 | 1.7957173  | 3.7160250  |
| H | -6.4841236 | 0.3048776  | 2.8697468  |
| H | -0.5043774 | 8.2119850  | 5.5816725  |
| H | -0.4621171 | 6.6033909  | 6.3710728  |
| H | 0.7260806  | 7.0068852  | 5.0830764  |
| H | 6.0039992  | 7.6596902  | -1.9541724 |
| H | 5.5738678  | 6.5730789  | -0.5938929 |
| H | 6.6742848  | 5.9987247  | -1.8952628 |
| H | 3.5340006  | -0.4919978 | -7.7500601 |
| H | 1.8952743  | -0.1939799 | -7.0795760 |
| H | 2.8525620  | 1.1640243  | -7.7634785 |
| H | -2.0910012 | -2.8637218 | -7.8759091 |

|   |            |            |            |
|---|------------|------------|------------|
| H | -0.9965587 | -1.6047782 | -7.2117964 |
| H | -0.3251527 | -3.1570135 | -7.8183645 |
| H | 3.4292986  | -9.0755841 | -1.9326064 |
| H | 2.7051861  | -8.1509409 | -0.5774160 |
| H | 1.6603703  | -8.7908079 | -1.8945506 |
| H | 7.1853497  | -3.7808498 | 5.6033437  |
| H | 5.8247548  | -2.9162887 | 6.3865388  |
| H | 5.4976994  | -4.1624922 | 5.1320268  |
| H | 4.2788445  | 5.9056469  | 4.5279395  |
| H | 5.6133999  | 4.9859396  | 3.7662634  |
| H | 4.1853706  | 5.4672864  | 2.7892746  |

**Am(sBuDGA)(NO<sub>3</sub>)<sub>3</sub>**

|   |            |            |            |
|---|------------|------------|------------|
| C | -2.6572745 | -0.8235789 | -1.8457364 |
| C | -2.1515559 | -2.2818303 | -1.8042752 |
| H | -2.9748333 | -2.9874150 | -1.5352114 |
| H | -1.7341690 | -2.5799670 | -2.7960009 |
| O | -1.1418096 | -2.3236323 | -0.8095029 |
| C | -0.6035744 | -3.6136562 | -0.5797170 |
| H | -1.4109934 | -4.3203821 | -0.2849739 |
| H | -0.1166042 | -4.0073431 | -1.5064492 |
| C | 0.4653716  | -3.4502677 | 0.5116297  |
| N | 0.9289911  | -4.5178901 | 1.2119660  |
| N | -3.6909227 | -0.4961566 | -2.6554849 |
| O | 0.9183494  | -2.2971764 | 0.6806098  |
| O | -2.0794930 | 0.0113226  | -1.1211191 |
| C | 2.0672556  | -4.2638073 | 2.1535421  |
| H | 2.2961917  | -3.1895241 | 2.0129722  |
| C | 0.3902892  | -5.9063378 | 1.1524361  |
| H | 1.0892319  | -6.4752774 | 1.7991304  |
| C | 1.6345247  | -4.4524365 | 3.6244605  |
| H | 0.6941673  | -3.8767481 | 3.7781612  |
| H | 1.3934908  | -5.5237428 | 3.8246519  |
| C | 2.6820898  | -3.9708138 | 4.6394055  |
| H | 2.9593522  | -2.9084134 | 4.4583535  |
| H | 3.6133091  | -4.5776161 | 4.6077299  |
| C | -1.0000883 | -6.0395408 | 1.8230603  |
| H | -1.7828263 | -5.5447473 | 1.2041057  |
| H | -0.9701261 | -5.4791836 | 2.7821432  |
| C | -1.4165542 | -7.4922148 | 2.0937318  |
| H | -0.6535171 | -8.0272787 | 2.7035143  |
| H | -1.5673168 | -8.0716086 | 1.1563363  |
| C | -4.1571748 | 0.9295632  | -2.7157677 |
| H | -5.0072691 | 0.9032779  | -3.4308760 |
| C | -4.7297162 | 1.4033204  | -1.3585736 |
| H | -3.9009229 | 1.5032133  | -0.6263795 |

|    |            |            |            |
|----|------------|------------|------------|
| H  | -5.4076796 | 0.6072734  | -0.9730330 |
| C  | -5.5059755 | 2.7233964  | -1.4546400 |
| H  | -4.8486100 | 3.5744487  | -1.7359367 |
| H  | -6.3309850 | 2.6675809  | -2.2026866 |
| C  | -4.3577860 | -1.4860535 | -3.5387080 |
| H  | -3.8753452 | -2.4645587 | -3.3383647 |
| C  | -4.0949804 | -1.1718255 | -5.0321106 |
| H  | -4.5732628 | -0.2030544 | -5.3028873 |
| H  | -2.9991036 | -1.0228460 | -5.1594969 |
| C  | -4.5774799 | -2.2657107 | -5.9948217 |
| H  | -5.6846830 | -2.3685026 | -5.9991337 |
| H  | -4.1455128 | -3.2596261 | -5.7359273 |
| H  | -5.9617013 | 2.9759287  | -0.4726488 |
| H  | -4.2655063 | -2.0303629 | -7.0353700 |
| H  | 2.2787704  | -4.0388176 | 5.6730247  |
| H  | -2.3735606 | -7.5234030 | 2.6582392  |
| C  | 3.3113967  | -5.0676275 | 1.7454934  |
| H  | 3.1921358  | -6.1638671 | 1.9020394  |
| H  | 3.5666702  | -4.8864450 | 0.6792273  |
| H  | 4.1833344  | -4.7424451 | 2.3516568  |
| C  | 0.4918018  | -6.5546252 | -0.2415492 |
| H  | -0.3035977 | -6.2190535 | -0.9411616 |
| H  | 1.4795257  | -6.3440443 | -0.7052805 |
| H  | 0.3953116  | -7.6575936 | -0.1509045 |
| C  | -5.8466872 | -1.6459575 | -3.1806634 |
| H  | -6.2946122 | -2.4860210 | -3.7530852 |
| H  | -5.9708865 | -1.8667766 | -2.0983887 |
| H  | -6.4346931 | -0.7317396 | -3.4159296 |
| C  | -3.0848721 | 1.8617348  | -3.3048867 |
| H  | -3.5319591 | 2.8547454  | -3.5251699 |
| H  | -2.2381310 | 2.0115667  | -2.6044773 |
| H  | -2.6809799 | 1.4592447  | -4.2578650 |
| Am | 0.2890339  | -0.1240321 | -0.2776749 |
| N  | 3.1131001  | 0.3882042  | 0.1088472  |
| O  | 2.6817717  | -0.4651435 | -0.7626322 |
| O  | 2.1854622  | 1.0276127  | 0.7451353  |
| O  | 4.2954506  | 0.5703168  | 0.3170120  |
| N  | -1.1235645 | 1.0323550  | 1.9839667  |
| N  | 0.3720869  | 0.6628920  | -3.0934256 |
| O  | 0.3440126  | -0.5758082 | -2.7006003 |
| O  | 0.3509885  | 0.9595129  | -4.2744329 |
| O  | 0.4050528  | 1.5354907  | -2.1526718 |
| O  | -0.6505031 | -0.1829390 | 1.9742475  |
| O  | -0.8472431 | 1.7303422  | 0.9427284  |
| O  | -1.7874857 | 1.4539115  | 2.9111291  |

**Eu(sBuDGA)(NO<sub>3</sub>)<sub>3</sub>**

|   |            |            |            |
|---|------------|------------|------------|
| C | -2.7780542 | -0.8717226 | -1.8388788 |
| C | -2.3758804 | -2.3624180 | -1.8330140 |
| H | -3.2795220 | -3.0139506 | -1.7448742 |
| H | -1.8323268 | -2.6205883 | -2.7729862 |
| O | -1.5240142 | -2.5447593 | -0.7162112 |
| C | -1.0110010 | -3.8599415 | -0.5525422 |
| H | -1.7240459 | -4.4737392 | 0.0353364  |
| H | -0.8605910 | -4.3459235 | -1.5478032 |
| C | 0.3784334  | -3.7239685 | 0.0959271  |
| N | 0.8922923  | -4.7066545 | 0.8733393  |
| N | -3.6655144 | -0.4272394 | -2.7578964 |
| O | 1.0202072  | -2.6888821 | -0.1913963 |
| O | -2.2672312 | -0.1234079 | -0.9771189 |
| C | 2.2841152  | -4.4909502 | 1.3818108  |
| H | 2.6508064  | -3.6260208 | 0.7950460  |
| C | 0.1328896  | -5.8658804 | 1.4226451  |
| H | 0.8635710  | -6.3397591 | 2.1092156  |
| C | 2.2712339  | -4.0610213 | 2.8673135  |
| H | 1.4615129  | -3.3091049 | 2.9936195  |
| H | 2.0116225  | -4.9313832 | 3.5172598  |
| C | 3.5978123  | -3.4418713 | 3.3317935  |
| H | 3.8495820  | -2.5464236 | 2.7209590  |
| H | 4.4497572  | -4.1551405 | 3.2690481  |
| C | -1.0818409 | -5.4676356 | 2.3101933  |
| H | -2.0153243 | -5.4536296 | 1.7013243  |
| H | -0.9389230 | -4.4295917 | 2.6820583  |
| C | -1.2873461 | -6.4232867 | 3.4939370  |
| H | -0.4119717 | -6.4081774 | 4.1812355  |
| H | -1.4399901 | -7.4755534 | 3.1628880  |
| C | -4.1069064 | 1.0061887  | -2.7355276 |
| H | -4.8066519 | 1.0847399  | -3.5945977 |
| C | -4.9269450 | 1.3070162  | -1.4584026 |
| H | -4.2606770 | 1.2314091  | -0.5726775 |
| H | -5.6970840 | 0.5092992  | -1.3490261 |
| C | -5.6180264 | 2.6769101  | -1.4801621 |
| H | -4.8864428 | 3.5142062  | -1.4704269 |
| H | -6.2645732 | 2.8009137  | -2.3795845 |
| C | -4.1386722 | -1.2835763 | -3.8766477 |
| H | -3.7461391 | -2.3021069 | -3.6828308 |
| C | -3.5119855 | -0.8203349 | -5.2158896 |
| H | -3.8980866 | 0.1910998  | -5.4782928 |
| H | -2.4169958 | -0.7002289 | -5.0533541 |
| C | -3.7562180 | -1.7818906 | -6.3870386 |
| H | -4.8298320 | -1.8427030 | -6.6708433 |
| H | -3.4084236 | -2.8133970 | -6.1491908 |
| H | -6.2652576 | 2.7982963  | -0.5844240 |
| H | -3.1968455 | -1.4440990 | -7.2861628 |
| H | 3.5213218  | -3.1123133 | 4.3907700  |

|    |            |            |            |
|----|------------|------------|------------|
| H  | -2.1803040 | -6.1281486 | 4.0865578  |
| C  | 3.1871709  | -5.6942557 | 1.0750442  |
| H  | 2.9140309  | -6.6030999 | 1.6580710  |
| H  | 3.1635787  | -5.9487705 | -0.0069277 |
| H  | 4.2382306  | -5.4455369 | 1.3349413  |
| C  | -0.2015087 | -6.9233636 | 0.3552588  |
| H  | -0.9403628 | -6.5572644 | -0.3908980 |
| H  | 0.7111373  | -7.2454238 | -0.1906915 |
| H  | -0.6435391 | -7.8210421 | 0.8401966  |
| C  | -5.6721605 | -1.4048845 | -3.9019058 |
| H  | -5.9820501 | -2.1639786 | -4.6513348 |
| H  | -6.0608242 | -1.7271397 | -2.9116709 |
| H  | -6.1678602 | -0.4477037 | -4.1748437 |
| C  | -2.9562283 | 1.9927331  | -2.9952457 |
| H  | -3.3728431 | 2.9994359  | -3.2132806 |
| H  | -2.2755828 | 2.0773981  | -2.1248259 |
| H  | -2.3480044 | 1.6844764  | -3.8714310 |
| Eu | -0.0311946 | -0.4899460 | 0.0046976  |
| N  | 2.1502855  | 0.9829869  | 1.2181386  |
| O  | 2.2945004  | -0.2156246 | 0.7593831  |
| O  | 0.9669897  | 1.4720282  | 1.1186507  |
| O  | 3.0734340  | 1.6016555  | 1.7141353  |
| N  | -1.3891952 | -1.1140211 | 2.5433554  |
| N  | 0.2442680  | 0.3683752  | -2.7911849 |
| O  | 0.1999034  | -0.8804716 | -2.4817908 |
| O  | 0.1993613  | 0.7511259  | -3.9522351 |
| O  | 0.3241550  | 1.1846392  | -1.8027604 |
| O  | -0.4716366 | -1.8820753 | 2.0444248  |
| O  | -1.5990327 | -0.0274700 | 1.9062441  |
| O  | -2.0061445 | -1.4256499 | 3.5480638  |
